# Supplementary material for: DFT study of hydrogen interaction with transition metal doped graphene for efficient hydrogen storage: effect of d-orbital occupancy and Kubas interaction
Source: Royal Society of Chemistry journal article supplement (doi:10.1039/d2cp03794g), 2022-11-24
Supplement: d2cp03794g1.pdf [file d2cp03794g1.pdf]

### Supplementary Information

## **DFT study of hydrogen interaction with transition metal doped graphene for efficient hydrogen storage: effect of d-orbital occupancy and Kubas interaction**

Karthick Raja K,<sup>1</sup> T Anusuya<sup>1</sup> and Vivek Kumar<sup>1,\*</sup>

<sup>1</sup>*Applied nanomaterials and Energy Laboratory, Department of Physics, Indian Institute of Information Technology Design & Manufacturing Kancheepuram, Chennai-600127, India*

**Table S1:** Fermi energy values of PG, GD, TM/PG and TM/GD.

| System                    | Fermi energy (eV) | Fermi energy after H <sub>2</sub> adsorption (eV) |
|---------------------------|-------------------|---------------------------------------------------|
| Pristine Graphene (PG)    | -0.436            | -0.352                                            |
| Graphene with defect (GD) | -1.100            | -0.990                                            |
| Fe/PG                     | 0.612             | -0.340                                            |
| Ag/GD                     | 0.273             | 0.511                                             |
| Au/GD                     | 0.357             | 0.520                                             |
| Cu/GD                     | -0.120            | 0.076                                             |
| Fe/GD                     | 0                 | 0.592                                             |

**Table S2:** Binding energy of TM atom on the GD layer ( $E_b$ ), Bond distance between TM atom and nearest carbon atom ( $D_{C-TM}$ ), Shortest distance between TM atom and GD layer ( $D_{GD\ layer-TM}$ ).

| System | $E_b$ (eV) | $D_{TM-C}$ (Å) | $D_{GD\ layer-TM}$ (Å) |
|--------|------------|----------------|------------------------|
| GD/Ag  | -1.917     | 2.200          | 1.601                  |
| GD/Au  | -2.554     | 2.125          | 1.485                  |
| GD/Cu  | -3.971     | 1.875          | 1.096                  |
| GD/Fe  | -10.003    | 1.746          | 0.889                  |

**Table S3:** Adsorption energy of H<sub>2</sub> on the different systems using GGA-PBE and after adding DFT-D3 correction.

| System                   | Adsorption Energy of H <sub>2</sub> (eV) |        |
|--------------------------|------------------------------------------|--------|
|                          | GGA-PBE                                  | DFT-D3 |
| GD/Ag – H <sub>2</sub>   | -0.405                                   | -0.404 |
| GD/Au – H <sub>2</sub>   | -0.341                                   | -0.339 |
| GD/Cu – H <sub>2</sub>   | -0.282                                   | -0.260 |
| GD/Fe – H <sub>2</sub>   | -0.580                                   | -0.578 |
| GD/Fe – 2 H <sub>2</sub> | -0.606                                   | -0.604 |
| GD/Fe – 3 H <sub>2</sub> | -0.866                                   | -0.864 |
| GD/Fe – 4 H <sub>2</sub> | -0.902                                   | -0.899 |
| GD/Fe – 5 H <sub>2</sub> | -0.921                                   | -0.917 |

**Table S4:** Partial charge on the C1, C2, C3, H1, H2, TM before and after H<sub>2</sub> adsorption

| System               | C1     | C2     | C3     | H1    | H2    | TM    |
|----------------------|--------|--------|--------|-------|-------|-------|
| Ag/GD                | -0.148 | -0.141 | -0.147 | -     | -     | 0.779 |
| Ag/GD-H <sub>2</sub> | -0.120 | -0.192 | -0.130 | 0.037 | 0.018 | 0.784 |
| Au/GD                | -0.039 | -0.088 | -0.039 | -     | -     | 0.210 |
| Au/GD-H <sub>2</sub> | -0.031 | -0.032 | -0.069 | 0.105 | 0.099 | 0.105 |
| Cu/GD                | -0.072 | -0.067 | -0.072 | -     | -     | 0.329 |
| Cu/GD-H <sub>2</sub> | -0.088 | -0.046 | -0.056 | 0.091 | 0.101 | 0.159 |
| Fe/GD                | -0.075 | -0.075 | -0.075 | -     | -     | 0.576 |
| Fe/GD-H <sub>2</sub> | -0.074 | -0.073 | -0.076 | 0.008 | 0.056 | 0.545 |

**Table S5:** Löwdin charge analysis of TM in TM/GD system before and after H<sub>2</sub> adsorption

| Ag/GD system Löwdin charge of Ag                                 |                                                                                                     |
|------------------------------------------------------------------|-----------------------------------------------------------------------------------------------------|
| Atom # 14:                                                       | total charge = 10.2193, s = 0.5305, p = 0.0000, d = 9.6888,                                         |
|                                                                  | spin up = 5.1103, s = 0.2651,                                                                       |
|                                                                  | spin up = 5.1103, p = 0.0000, pz= 0.0000, px= 0.0000, py= 0.0000,                                   |
|                                                                  | spin up = 5.1103, d = 4.8452, dz2= 0.9960, dxz= 0.9385, dyz= 0.9384, dx2-y2= 0.9862, dxy= 0.9861,   |
|                                                                  | spin down = 5.1090, s = 0.2654,                                                                     |
|                                                                  | spin down = 5.1090, p = 0.0000, pz= 0.0000, px= 0.0000, py= 0.0000,                                 |
|                                                                  | spin down = 5.1090, d = 4.8436, dz2= 0.9959, dxz= 0.9378, dyz= 0.9377, dx2-y2= 0.9861, dxy= 0.9861, |
|                                                                  | polarization = 0.0013, s = -0.0003, p = 0.0000, d = 0.0016,                                         |
| Ag/GD system Löwdin charge of Ag after H <sub>2</sub> adsorption |                                                                                                     |
| Atom # 14:                                                       | total charge = 10.2159, s = 0.4927, p = 0.0000, d = 9.7233,                                         |
|                                                                  | spin up = 5.1101, s = 0.2447,                                                                       |
|                                                                  | spin up = 5.1101, p = 0.0000, pz= 0.0000, px= 0.0000, py= 0.0000,                                   |
|                                                                  | spin up = 5.1101, d = 4.8654, dz2= 0.9808, dxz= 0.9474, dyz= 0.9586, dx2-y2= 0.9919, dxy= 0.9866,   |
|                                                                  | spin down = 5.1058, s = 0.2479,                                                                     |
|                                                                  | spin down = 5.1058, p = 0.0000, pz= 0.0000, px= 0.0000, py= 0.0000,                                 |
|                                                                  | spin down = 5.1058, d = 4.8579, dz2= 0.9807, dxz= 0.9422, dyz= 0.9573, dx2-y2= 0.9918, dxy= 0.9860, |
|                                                                  | polarization = 0.0043, s = -0.0032, p = 0.0000, d = 0.0075,                                         |

| Au/GD system Löwdin charge of Au                                 |                                                                                                     |
|------------------------------------------------------------------|-----------------------------------------------------------------------------------------------------|
| Atom # 14:                                                       | total charge = 10.7904, s = 0.8131, p = 0.5858, d = 9.3915,                                         |
|                                                                  | spin up = 5.3974, s = 0.4077,                                                                       |
|                                                                  | spin up = 5.3974, p = 0.2937, pz= 0.1336, px= 0.0801, py= 0.0801,                                   |
|                                                                  | spin up = 5.3974, d = 4.6959, dz2= 0.9901, dxz= 0.8836, dyz= 0.8837, dx2-y2= 0.9692, dxy= 0.9692,   |
|                                                                  | spin down = 5.3930, s = 0.4054,                                                                     |
|                                                                  | spin down = 5.3930, p = 0.2920, pz= 0.1321, px= 0.0800, py= 0.0800,                                 |
|                                                                  | spin down = 5.3930, d = 4.6956, dz2= 0.9901, dxz= 0.8835, dyz= 0.8835, dx2-y2= 0.9692, dxy= 0.9692, |
|                                                                  | polarization = 0.0044, s = 0.0024, p = 0.0017, d = 0.0003,                                          |
| Au/GD system Löwdin charge of Au after H <sub>2</sub> adsorption |                                                                                                     |
| Atom # 14:                                                       | total charge = 10.8950, s = 0.7832, p = 0.6867, d = 9.4250,                                         |
|                                                                  | spin up = 5.4604, s = 0.3926,                                                                       |
|                                                                  | spin up = 5.4604, p = 0.3497, pz= 0.1515, px= 0.1182, py= 0.0799,                                   |
|                                                                  | spin up = 5.4604, d = 4.7181, dz2= 0.9531, dxz= 0.9000, dyz= 0.9219, dx2-y2= 0.9776, dxy= 0.9656,   |
|                                                                  | spin down = 5.4346, s = 0.3906,                                                                     |
|                                                                  | spin down = 5.4346, p = 0.3371, pz= 0.1492, px= 0.1134, py= 0.0744,                                 |
|                                                                  | spin down = 5.4346, d = 4.7069, dz2= 0.9528, dxz= 0.8941, dyz= 0.9176, dx2-y2= 0.9771, dxy= 0.9652, |
|                                                                  | polarization = 0.0258, s = 0.0020, p = 0.0126, d = 0.0112,                                          |

| Cu/GD system Löwdin charge of Cu                                 |                                                                                                     |
|------------------------------------------------------------------|-----------------------------------------------------------------------------------------------------|
| Atom # 14:                                                       | total charge = 10.6710, s = 0.5485, p = 0.6288, d = 9.4937,                                         |
|                                                                  | spin up = 5.3363, s = 0.2742,                                                                       |
|                                                                  | spin up = 5.3363, p = 0.3148, pz= 0.1145, px= 0.0975, py= 0.1027,                                   |
|                                                                  | spin up = 5.3363, d = 4.7474, dz2= 0.9913, dxz= 0.9101, dyz= 0.9148, dx2-y2= 0.9644, dxy= 0.9667,   |
|                                                                  | spin down = 5.3347, s = 0.2743,                                                                     |
|                                                                  | spin down = 5.3347, p = 0.3140, pz= 0.1146, px= 0.0972, py= 0.1022,                                 |
|                                                                  | spin down = 5.3347, d = 4.7463, dz2= 0.9913, dxz= 0.9098, dyz= 0.9143, dx2-y2= 0.9642, dxy= 0.9666, |
|                                                                  | polarization = 0.0016, s = -0.0001, p = 0.0007, d = 0.0010,                                         |
| Cu/GD system Löwdin charge of Cu after H <sub>2</sub> adsorption |                                                                                                     |
| Atom # 14:                                                       | total charge = 10.8407, s = 0.5124, p = 0.7975, d = 9.5308,                                         |
|                                                                  | spin up = 5.4262, s = 0.2561,                                                                       |
|                                                                  | spin up = 5.4262, p = 0.4021, pz= 0.1418, px= 0.0925, py= 0.1678,                                   |
|                                                                  | spin up = 5.4262, d = 4.7680, dz2= 0.9815, dxz= 0.9133, dyz= 0.9285, dx2-y2= 0.9658, dxy= 0.9788,   |
|                                                                  | spin down = 5.4145, s = 0.2563,                                                                     |
|                                                                  | spin down = 5.4145, p = 0.3954, pz= 0.1418, px= 0.0884, py= 0.1651,                                 |
|                                                                  | spin down = 5.4145, d = 4.7628, dz2= 0.9814, dxz= 0.9114, dyz= 0.9269, dx2-y2= 0.9650, dxy= 0.9782, |
|                                                                  | polarization = 0.0117, s = -0.0003, p = 0.0068, d = 0.0052,                                         |

**Fe/GD system Löwdin charge of Fe**

```

Atom # 14: total charge = 7.4241, s = 0.3612, p = 0.0000, d = 7.0629,
spin up = 3.7632, s = 0.1885,
spin up = 3.7632, p = 0.0000, pz= 0.0000, px= 0.0000, py= 0.0000,
spin up = 3.7632, d = 3.5747, dz2= 0.7023, dxz= 0.7143, dyz= 0.7145, dx2-y2= 0.7217, dxy= 0.7219,
spin down = 3.6609, s = 0.1727,
spin down = 3.6609, p = 0.0000, pz= 0.0000, px= 0.0000, py= 0.0000,
spin down = 3.6609, d = 3.4882, dz2= 0.6150, dxz= 0.7107, dyz= 0.7109, dx2-y2= 0.7257, dxy= 0.7259,
polarization = 0.1022, s = 0.0158, p = 0.0000, d = 0.0865,

```

**Fe/GD system Löwdin charge of Fe after H<sub>2</sub> adsorption**

```

Atom # 14: total charge = 7.4553, s = 0.3487, p = 0.0000, d = 7.1066,
spin up = 3.7369, s = 0.1743,
spin up = 3.7369, p = 0.0000, pz= 0.0000, px= 0.0000, py= 0.0000,
spin up = 3.7369, d = 3.5626, dz2= 0.6307, dxz= 0.7505, dyz= 0.7197, dx2-y2= 0.7651, dxy= 0.6966,
spin down = 3.7184, s = 0.1744,
spin down = 3.7184, p = 0.0000, pz= 0.0000, px= 0.0000, py= 0.0000,
spin down = 3.7184, d = 3.5440, dz2= 0.6193, dxz= 0.7498, dyz= 0.7190, dx2-y2= 0.7630, dxy= 0.6929,
polarization = 0.0185, s = -0.0001, p = 0.0000, d = 0.0186,

```

**Table S6:** Increasing number of H<sub>2</sub>, change in total adsorption energy, change in adsorption energy per H<sub>2</sub>, Average H-H distance.

| Number of H <sub>2</sub> | Adsorption Energy (eV) | Average adsorption energy per H <sub>2</sub> (eV / H <sub>2</sub> ) | Average H-H Distance (Å) |
|--------------------------|------------------------|---------------------------------------------------------------------|--------------------------|
| 1                        | -0.580                 | -0.580                                                              | 0.843                    |
| 2                        | -0.606                 | -0.303                                                              | 0.813                    |
| 3                        | -0.866                 | -0.289                                                              | 0.814                    |
| 4                        | -0.902                 | -0.226                                                              | 0.799                    |
| 5                        | -0.921                 | -0.184                                                              | 0.789                    |

**Table S7:** Desorption Temperature of First adsorbed to last adsorbed H<sub>2</sub> in the Fe/GD system at different atmospheric pressure.

| H <sub>2</sub> Number | Adsorption Energy (eV) | Desorption Temperature (K) at Different Pressure (atm) |       |       |
|-----------------------|------------------------|--------------------------------------------------------|-------|-------|
|                       |                        | 1 atm                                                  | 2 atm | 3 atm |
| 1                     | -0.580                 | 740                                                    | 801   | 842   |
| 2                     | -0.300                 | 387                                                    | 419   | 440   |
| 3                     | -0.283                 | 368                                                    | 399   | 420   |
| 4                     | -0.217                 | 288                                                    | 312   | 327   |
| 5                     | -0.178                 | 235                                                    | 254   | 267   |

**Table S8:** Atomic Cartesian coordinates (in Å) for all optimized geometries. Each structure is labelled by the specific name, followed by the total energy (in Rydberg).

### Pristine Graphene (PG)

Final energy = -205.1108914153 Ry  
 Begin final coordinates

| ATOMIC_POSITIONS (angstrom) |              |              |             |
|-----------------------------|--------------|--------------|-------------|
| C                           | 0.000000000  | -0.000000000 | 1.750025449 |
| C                           | -1.229996516 | 2.130420458  | 1.750000118 |
| C                           | -2.459999593 | 4.260848788  | 1.750000118 |
| C                           | 2.459996922  | -0.000002246 | 1.750000118 |
| C                           | 1.229996516  | 2.130420458  | 1.750000118 |
| C                           | 0.000000000  | 4.260845000  | 1.749986329 |
| C                           | 4.920003078  | -0.000002246 | 1.750000118 |
| C                           | 3.690000000  | 2.130422000  | 1.749986406 |
| C                           | 2.459999593  | 4.260848788  | 1.750000118 |
| C                           | 0.000000000  | 1.420275300  | 1.750016024 |
| C                           | -1.230003314 | 3.550701087  | 1.749989824 |
| C                           | -2.460004070 | 5.681127350  | 1.750016024 |
| C                           | 2.459998340  | 1.420279041  | 1.749994521 |
| C                           | 1.230003314  | 3.550701087  | 1.749989824 |
| C                           | 0.000000000  | 5.681128827  | 1.749989824 |
| C                           | 4.920001660  | 1.420279041  | 1.749994521 |
| C                           | 3.690000000  | 3.550704917  | 1.749994521 |
| C                           | 2.460004070  | 5.681127350  | 1.750016024 |

End final coordinates

### Graphene with Defect (GD)

Final energy = -193.1340460413 Ry  
 Begin final coordinates

| ATOMIC_POSITIONS (angstrom) |              |              |             |
|-----------------------------|--------------|--------------|-------------|
| C                           | 0.003705404  | -0.002141648 | 1.750025142 |
| C                           | -1.239189427 | 2.125109804  | 1.749991041 |
| C                           | -2.460008363 | 4.265127086  | 1.749949980 |
| C                           | 2.456287969  | -0.002135361 | 1.749949964 |
| C                           | 1.230013150  | 2.082038573  | 1.750104375 |
| C                           | -0.041930814 | 4.285054088  | 1.750051607 |
| C                           | 4.920006477  | 0.010612916  | 1.749991045 |
| C                           | 3.699204565  | 2.125108853  | 1.749943440 |
| C                           | 2.501908122  | 4.285025494  | 1.750104380 |
| C                           | -0.000466681 | 1.442632936  | 1.750045970 |
| C                           | -1.210895376 | 3.539119776  | 1.749982968 |
| C                           | -2.460005382 | 5.681128003  | 1.749973324 |
| C                           | 2.460478718  | 1.442630936  | 1.749970972 |
| C                           | 0.019585098  | 5.670371588  | 1.749982957 |
| C                           | 4.920011438  | 1.420274598  | 1.749917873 |
| C                           | 3.670883457  | 3.539113253  | 1.749970987 |
| C                           | 2.440408645  | 5.670353106  | 1.750045975 |

End final coordinates

### PG/Ag

Final energy = -278.5707944125 Ry  
 Begin final coordinates

| ATOMIC_POSITIONS (angstrom) |              |             |             |
|-----------------------------|--------------|-------------|-------------|
| C                           | 0.000990571  | 0.000301667 | 2.876723759 |
| C                           | -1.229020322 | 2.130675413 | 2.876128901 |
| C                           | -2.458848169 | 4.261224574 | 2.876201017 |
| C                           | 2.460994814  | 0.000135948 | 2.876057047 |
| C                           | 1.230859825  | 2.130646762 | 2.876569411 |
| C                           | 0.000861812  | 4.261202777 | 2.875920902 |
| C                           | 4.920991162  | 0.000274057 | 2.876107127 |
| C                           | 3.691139383  | 2.130577629 | 2.876796163 |
| C                           | 2.460949780  | 4.261340349 | 2.876891605 |
| C                           | 0.000857702  | 1.420508534 | 2.876266723 |
| C                           | -1.229008322 | 3.550999134 | 2.876022641 |
| C                           | -2.458991486 | 5.681422236 | 2.876370135 |
| C                           | 2.460931545  | 1.420370583 | 2.876627742 |
| C                           | 1.230785038  | 3.551050225 | 2.876540920 |
| C                           | 0.000952650  | 5.681396585 | 2.875973982 |
| C                           | 4.921157821  | 1.420467554 | 2.876097291 |
| C                           | 3.691177755  | 3.551102989 | 2.877001828 |
| C                           | 2.460990591  | 5.681625943 | 2.876370494 |
| Ag                          | 2.599951852  | 2.910957041 | 6.589843310 |

End final coordinates

### PG/Au

Final energy = -306.9421791737 Ry  
 Begin final coordinates

| ATOMIC_POSITIONS (angstrom) |              |             |             |
|-----------------------------|--------------|-------------|-------------|
| C                           | 0.027597580  | 0.003162442 | 2.863897054 |
| C                           | -1.202380076 | 2.133587488 | 2.864148040 |
| C                           | -2.432395894 | 4.263983336 | 2.863457649 |
| C                           | 2.487649580  | 0.003134214 | 2.863715940 |
| C                           | 1.257413755  | 2.133199764 | 2.869048550 |
| C                           | 0.027390715  | 4.264221500 | 2.864857919 |
| C                           | 4.947593110  | 0.003186203 | 2.864075512 |
| C                           | 3.717706042  | 2.133620594 | 2.863436737 |
| C                           | 2.487914798  | 4.264288457 | 2.864869057 |
| C                           | 0.027338364  | 1.423241729 | 2.865149508 |
| C                           | -1.202368395 | 3.553882119 | 2.864155903 |
| C                           | -2.432408791 | 5.684299235 | 2.864062887 |
| C                           | 2.487966531  | 1.423143934 | 2.865460528 |
| C                           | 1.257450304  | 3.554392915 | 2.868401371 |
| C                           | 0.027594485  | 5.684324220 | 2.863744171 |
| C                           | 4.947617868  | 1.423477275 | 2.863454384 |
| C                           | 3.717647230  | 3.553863703 | 2.863306388 |
| C                           | 2.487672137  | 5.684334990 | 2.863720078 |
| Au                          | 1.873352656  | 2.773072884 | 6.381009324 |

End final coordinates

## PG/Cu

Final energy = -326.3613340258 Ry  
Begin final coordinates

```
ATOMIC_POSITIONS (angstrom)
C      -0.050911902  -0.042076927  1.699878064
C      -1.280549940  2.086781557  1.700399761
C      -2.500334051  4.222893993  1.729713196
C      2.409686053  -0.043763199  1.689435618
C      1.177925090  2.086320962  1.699726951
C      -0.051342057  4.218288437  1.692438482
C      4.868127695  -0.043476780  1.692587903
C      3.639636903  2.075093164  1.729650131
C      2.398917214  4.223292725  1.752286442
C      -0.051298478  1.377097564  1.694285709
C      -1.278345050  3.507352670  1.700580827
C      -2.509299310  5.640273928  1.699979678
C      2.407657125  1.374193449  1.699893592
C      1.173747608  3.506492986  1.707044264
C      -0.051088013  5.637793134  1.693637871
C      4.870320485  1.374628596  1.700670009
C      3.641915924  3.505648955  1.805578387
C      2.407108125  5.642712944  1.707210721
Cu     3.404543580  3.643495844  3.900402394
End final coordinates
```

## PG/Fe

Final energy = -260.6179157026 Ry  
Begin final coordinates

```
ATOMIC_POSITIONS (angstrom)
C      -0.007184232  -0.000894650  1.712852822
C      -1.231915977  2.120391955  1.712857399
C      -2.447797425  4.265068442  1.715734743
C      2.458091332  -0.020239969  1.715598599
C      1.218892030  2.121174475  1.702579352
C      -0.016032593  4.265070486  1.715534707
C      4.923367257  -0.000885037  1.712889140
C      3.697267387  2.121184413  1.702891963
C      2.458078159  4.267564646  1.702738123
C      -0.016044710  1.408188148  1.715509441
C      -1.231918937  3.552851846  1.712882078
C      -2.456643476  5.674145263  1.712877262
C      2.458069963  1.405746726  1.702738249
C      1.218869462  3.552087640  1.702569125
C      -0.007177382  5.674155677  1.712847073
C      4.932194774  1.408208587  1.715708269
C      3.697290519  3.552087864  1.702899645
C      2.458097925  5.693509027  1.715642947
Fe     2.457657924  2.837106460  3.247492062
End final coordinates
```

## GD/Ag

Final energy = -266.7189655118 Ry  
Begin final coordinates

```
ATOMIC_POSITIONS (angstrom)
C      -0.000693570  0.015366604  1.638657737
C      -1.243050134  2.143341025  1.657117901
C      -2.464743353  4.283249063  1.638658426
C      2.451198843  0.015363557  1.638444214
C      1.225154452  2.060714714  1.812877059
C      -0.080501077  4.322161570  1.813196656
C      4.915262459  0.027153287  1.657486360
C      3.693454190  2.143406446  1.657413922
C      2.531276422  4.322426656  1.815359774
C      -0.012799698  1.442339642  1.683272774
C      -1.235003681  3.559275373  1.683370399
C      -2.464729390  5.698860950  1.644713618
C      2.463196370  1.442401006  1.683348437
Ag     1.224496499  3.567711327  3.416556417
C      0.003046693  5.703485285  1.683494405
C      4.915216711  1.437958519  1.636628264
C      3.685504604  3.559326178  1.684159475
C      2.447503662  5.703572798  1.684198162
End final coordinates
```

## GD/Au

Final energy = -295.1309478584 Ry  
Begin final coordinates

```
ATOMIC_POSITIONS (angstrom)
C      0.004035291  -0.002329776  2.834066904
C      -1.237388012  2.126160472  2.883761232
C      -2.459998803  4.265518001  2.834217197
C      2.455953661  -0.002337537  2.834217197
C      1.230008034  2.031209500  3.061319949
C      -0.085989949  4.310491320  3.061988408
C      4.919996586  0.008528971  2.883761232
C      3.697398273  2.126150605  2.883719425
C      2.545924562  4.310444292  3.061319949
C      -0.009715275  1.418431602  2.903609080
C      -1.236477140  3.543222716  2.903928694
C      -2.460014554  5.681133403  2.834838112
C      2.469719856  1.418415187  2.903661821
Au     1.230091305  3.550650285  4.547103155
C      0.003239546  5.690474510  2.903928694
C      4.919998594  1.420280812  2.857288052
C      3.696474904  3.543217764  2.903661821
C      2.456743122  5.690462873  2.903609080
End final coordinates
```

## GD/Cu

Final energy = -314.6381294996 Ry  
Begin final coordinates

```
ATOMIC_POSITIONS (angstrom)
C      0.003275292  0.004988753  2.883274967
C      -1.237797987  2.133576508  2.912373903
C      -2.460902983  4.272621749  2.879991811
C      2.454925204  0.004981125  2.883293216
C      1.229103240  2.023154527  3.133508330
C      -0.089963557  4.323738431  3.082056917
C      4.919099525  0.019896878  2.902106549
C      3.695979360  2.133588716  2.912346107
C      2.548139399  4.323742318  3.081987768
C      -0.011867493  1.423272724  2.946287076
C      -1.236587313  3.550370449  2.930772834
C      -2.460903645  5.687390953  2.890800616
C      2.470069554  1.423725625  2.946270078
Cu     1.229157904  3.571715141  4.191614104
C      0.002963267  5.701447587  2.926310647
C      4.919096336  1.429681551  2.882259531
C      3.694775706  3.550384144  2.930731583
C      2.455235991  5.701459821  2.926290961
End final coordinates
```

## GD/Fe

Final energy = -249.0792117970 Ry  
Begin final coordinates

```
ATOMIC_POSITIONS (angstrom)
C      -0.000797102  0.008427507  2.855564820
C      -1.235048053  2.138876622  2.921689360
C      -2.462981443  4.273000561  2.855379409
C      2.454808445  0.008404537  2.855493615
C      1.227011503  2.056523646  3.155146359
C      -0.075356555  4.312283488  3.154795879
C      4.917009005  0.012044085  2.921540243
C      3.689055960  2.138879153  2.921599411
C      2.529418236  4.312307916  3.154684357
C      -0.008995950  1.417949251  2.944875281
C      -1.246378615  3.561140717  2.944636122
C      -2.463000509  5.690783224  2.844845324
C      2.463001001  1.417940650  2.944769304
Fe     1.227136598  3.560614278  4.043719089
C      -0.010374637  5.702001222  2.944575131
C      4.917001930  1.429938438  2.861423400
C      3.700413382  3.561137772  2.944527751
C      2.464389804  5.702025932  2.944575143
End final coordinates
```

## PG-H<sub>2</sub>

Final energy = -207.4444676858 Ry  
Begin final coordinates

```
ATOMIC_POSITIONS (angstrom)
C      -0.003105178  -0.006092731  1.510572205
C      -1.233102014  2.124370668  1.510676460
C      -2.463133086  4.254770552  1.510551380
C      2.456884726  -0.006099061  1.510896987
C      1.226898513  2.124399221  1.510586769
C      -0.003084585  4.254756647  1.510591646
C      4.916906573  -0.006095200  1.510644937
C      3.686878669  2.124414440  1.510631663
C      2.456895071  4.254765757  1.509419927
C      -0.003096945  1.414214391  1.510711099
C      -1.233113540  3.544667617  1.510730516
C      -2.463103886  5.675027320  1.510729164
C      2.456883986  1.414220775  1.510781626
C      1.226955427  3.544686253  1.510033997
C      -0.003113925  5.675021153  1.510783983
C      4.916886615  1.414221403  1.510787605
C      3.686834739  3.544700789  1.509999938
C      2.456903904  5.674971158  1.510054756
H      2.515409351  4.750691710  5.094842740
H      2.595741585  4.008204138  5.185371603
End final coordinates
```

## GD-H<sub>2</sub>

Final energy = -195.4695737127 Ry  
Begin final coordinates

```
ATOMIC_POSITIONS (angstrom)
C      -0.048140973  0.009546301  1.593388362
C      -1.286720549  2.140481479  1.572832062
C      -2.511258814  4.277606241  1.529529581
C      2.405413321  0.009341749  1.600043708
C      1.176873020  2.088649512  1.772474220
C      -0.076246921  4.298356004  1.493524725
C      4.868511430  0.027719425  1.576393404
C      3.642358779  2.141299207  1.573053536
C      2.435555471  4.301687960  1.463117947
C      -0.051056741  1.451228456  1.639395939
C      -1.255671790  3.555021294  1.521035991
C      -2.511244240  5.692377289  1.574557595
C      2.406779975  1.452147593  1.643447043
C      -0.031757828  5.684812586  1.571106890
C      4.867733022  1.438616007  1.573938118
C      3.612787878  3.555705932  1.513048604
C      2.389625921  5.686258304  1.558083959
H      2.420393019  3.297474992  5.287770718
H      2.077580021  3.207237671  4.623267598
End final coordinates
```

## GD/Ag-H<sub>2</sub>

Final energy = -269.0798710588 Ry  
Begin final coordinates

```
ATOMIC_POSITIONS (angstrom)
C      -0.024441807  0.050176009  1.536427377
C      -1.252484491  2.182029313  1.614991695
C      -2.487200426  4.316116990  1.584509236
C      2.428765941  0.049771465  1.575020002
C      1.236190240  2.147670751  1.515297133
C      -0.139943313  4.371151030  2.012053593
C      4.893420321  0.040912123  1.626842675
C      3.694026787  2.162123766  1.554685504
C      2.490532164  4.301019846  1.613536148
C      -0.014271591  1.496799923  1.548560487
C      -1.264765369  3.600038170  1.709878764
C      -2.492929666  5.736246142  1.567371212
C      2.452623223  1.476773596  1.533401895
Ag     1.266438794  3.546956721  3.418617522
C      -0.032201622  5.733837612  1.712554228
C      4.909126234  1.458172276  1.583477400
C      3.672614877  3.579523447  1.566536161
C      2.419857069  5.707646814  1.578582033
H      1.389875395  3.278705915  5.402377769
H      2.085429239  2.998713091  5.147580165
End final coordinates
```

## GD/Au-H<sub>2</sub>

Final energy = -297.4872088845 Ry  
Begin final coordinates

```
ATOMIC_POSITIONS (angstrom)
C      0.100728965  0.055479431  2.877976549
C      -1.163058911  2.172400146  2.870890430
C      -2.364457298  4.325351572  2.878232657
C      2.556535790  0.059096523  2.833441148
C      1.290347694  2.139910727  2.892511757
C      0.035455215  4.313416492  2.892872235
C      5.019531736  0.050719967  2.968233851
C      3.780816158  2.196251364  2.968188297
C      2.686983267  4.395213773  3.423379954
C      0.076585004  1.477830593  2.848526453
C      -1.144761426  3.593250941  2.848871005
C      -2.354320689  5.745485479  2.859669608
C      2.544714287  1.502747592  2.884994140
Au     1.291917723  3.589976614  4.685046133
C      0.110852743  5.718307893  2.885162133
C      5.001283595  1.470529390  2.917752971
C      3.801398861  3.617022189  3.062585335
C      2.570255097  5.749394829  3.062491669
H      0.647462688  3.218842905  6.328456380
H      0.053329500  2.875138582  5.820611296
End final coordinates
```

## GD/Cu-H<sub>2</sub>

Final energy = -316.9900005314 Ry  
Begin final coordinates

```
ATOMIC_POSITIONS (angstrom)
C      0.041679550  -0.090984860  2.895403768
C      -1.194895030  2.035524390  2.954587880
C      -2.423371791  4.170375397  2.855515464
C      2.489664735  -0.091653381  2.879767333
C      1.247438141  1.901713037  3.409091475
C      0.008329537  4.213426128  2.837168114
C      4.953264862  -0.060131570  2.889890980
C      3.708140344  2.043417675  2.986156514
C      2.544422755  4.245220335  3.075309796
C      0.027258088  1.311409654  3.049851815
C      -1.173034015  3.454533071  2.872976887
C      -2.421731197  5.580195919  2.875076738
C      2.483916514  1.317204161  3.061692704
Cu     1.199428542  3.555940245  4.287412742
C      0.041422462  5.601409380  2.839272369
C      4.946080174  1.345312871  2.916783619
C      3.706090447  3.463582747  2.946248189
C      2.492793593  5.616477955  2.913380133
H      0.784467037  4.071962938  5.897343010
H      0.987207252  4.766684907  5.530175470
End final coordinates
```

## GD/Fe-H<sub>2</sub>

Final energy = -251.4529787559 Ry  
Begin final coordinates

```
ATOMIC_POSITIONS (angstrom)
C      0.021675225  -0.003412986  2.860666826
C      -1.210496997  2.128118543  2.933836065
C      -2.432747954  4.261649710  2.873208966
C      2.480826943  -0.010356069  2.873181212
C      1.253226679  2.043568737  3.124361892
C      -0.044506054  4.295643498  3.232956001
C      4.939635705  -0.002083753  2.933845520
C      3.715756715  2.124649981  2.914578450
C      2.554707164  4.297811582  3.124445789
C      0.012371637  1.408897281  2.934667420
C      -1.213994778  3.552558983  2.982162786
C      -2.439765052  5.678565799  2.864522047
C      2.491533234  1.401825158  2.932441626
Fe     1.328858827  3.502705604  4.087989889
C      0.014285682  5.679990691  2.982149528
C      4.943616322  1.415749819  2.872917741
C      3.729626519  3.546280010  2.932475183
C      2.483926279  5.689753954  2.934697757
H      1.245121315  3.551399933  5.820318505
H      0.561175591  3.946122524  5.526267797
End final coordinates
```

### GD/Fe – 2H<sub>2</sub>

Final energy = -253.7921752392 Ry  
Begin final coordinates

```
ATOMIC_POSITIONS (angstrom)
C      0.091048465  0.119644771  2.818352641
C     -1.144238687  2.251436410  2.932309375
C     -2.367818753  4.385133100  2.869554501
C     2.547627979  0.116411422  2.869517467
C     1.304646362  2.171980676  3.172316954
C     0.023082980  4.419749396  3.259807110
C     5.007258081  0.123556380  2.932248418
C     3.774381671  2.253999197  2.954653389
C     2.610531979  4.433815209  3.172329693
C     0.082559962  1.529183061  2.921398868
C     -1.145367576  3.675196807  2.984353488
C     -2.370421035  5.801683134  2.843305985
C     2.545748846  1.531134651  2.963607194
Fe     1.372729998  3.640620553  4.201905956
C     0.083670594  5.803957735  2.984304770
C     5.003498581  1.544305382  2.878429973
C     3.786113013  3.679461429  2.963658198
C     2.556140414  5.813549325  2.921330162
H     0.657805040  2.564483437  5.413077824
H     0.162070514  3.208826740  5.440637715
H     1.140717938  4.904782406  5.440297019
H     1.946734634  4.798188779  5.412820300
End final coordinates
```

### GD/Fe – 3H<sub>2</sub>

Final energy = -256.1363897153 Ry  
Begin final coordinates

```
ATOMIC_POSITIONS (angstrom)
C      0.137216567  0.092311602  2.834267261
C     -1.094394437  2.225204266  2.946158478
C     -2.325473294  4.358275896  2.834112667
C     2.591275646  0.092442857  2.834073765
C     1.364303160  2.146551939  3.244748638
C     0.066971282  4.393951366  3.244868799
C     5.054255338  0.092570237  2.945728839
C     3.823097420  2.225250427  2.945485254
C     2.662067291  4.393841908  3.244007443
C     0.137922745  1.506313339  2.962145118
C     -1.100575366  3.651863386  2.961930462
C     -2.325695103  5.775185247  2.820597693
C     2.590677418  1.506433783  2.961394892
Fe     1.365311036  3.645196121  4.331922506
C     0.125509058  5.776118863  2.961798863
C     5.054336506  1.514357079  2.878822842
C     3.829694430  3.651804513  2.961275807
C     2.602974784  5.776060972  2.961365795
H     0.389721519  2.612596102  5.370097510
H    -0.015763499  3.318660937  5.372025187
H     2.748557433  3.315318148  5.368144419
H     2.341791189  2.609997452  5.366261021
H     0.960399974  5.008922352  5.366213698
H     1.774683904  5.007166202  5.367186043
End final coordinates
```

### GD/Fe – 4H<sub>2</sub>

Final energy = -258.4701823105 Ry  
Begin final coordinates

```
ATOMIC_POSITIONS (angstrom)
C      0.133483092  0.289188935  2.737051484
C     -1.098047568  2.421864045  2.849514838
C     -2.329234986  4.554766612  2.736687966
C     2.587933640  0.289139016  2.736820135
C     1.360725755  2.343243312  3.148865686
C     0.063285563  4.590557639  3.148718805
C     5.050726994  0.289300580  2.849255900
C     3.819454192  2.421855532  2.849140322
C     2.658323736  4.590544416  3.148352397
C     0.134258102  1.703092035  2.865590976
C     -1.104326294  3.848494612  2.865325917
C     -2.329294564  5.971874194  2.722562163
C     2.587131277  1.703092993  2.865198215
Fe     1.361124331  3.841647558  4.235130411
C     0.122057701  5.972743199  2.865220300
C     5.050706831  1.711006904  2.782036279
C     3.825854133  3.848461981  2.864949501
C     2.599392323  5.972799998  2.865155353
H     0.384474047  2.809848806  5.274814589
H    -0.022116941  3.514836466  5.273285677
H     2.743473659  3.513003617  5.275941029
H     2.337642876  2.807740397  5.273430658
H     0.955499990  5.204037128  5.275434511
H     1.769128636  5.204898831  5.272567247
H     1.460856507  -0.545557333  5.826047552
H     1.479983966  -0.552978472  6.579414089
End final coordinates
```

### GD/Fe – 5H<sub>2</sub>

Final energy = -260.8027232080 Ry  
Begin final coordinates

```
ATOMIC_POSITIONS (angstrom)
C      0.128572376  0.274722173  2.521041409
C     -1.102801635  2.407519113  2.632950556
C     -2.334088298  4.540452577  2.520606283
C     2.583151117  0.274664794  2.521008070
C     1.355944404  2.328725948  2.933263293
C     0.058508200  4.576089433  2.933831656
C     5.045838632  0.274880505  2.633514310
C     3.814569063  2.407464358  2.632677943
C     2.653342539  4.576062676  2.933626332
C     0.129432030  1.688728838  2.649340026
C     -1.109064384  3.834205931  2.649403459
C     -2.334155232  5.957533772  2.506739001
C     2.582334634  1.688676610  2.649132042
Fe     1.356018033  3.826146616  4.020875336
C     0.117249847  5.958240402  2.649953664
C     5.045901786  1.696609061  2.565533543
C     3.820850484  3.834161732  2.649026306
C     2.594439875  5.958257975  2.649779826
H     0.379816583  2.793964225  5.061570018
H    -0.029572031  3.497201482  5.054971281
H     2.740306173  3.496613328  5.056732107
H     2.330927934  2.793285504  5.061322892
H     0.948248940  5.186218410  5.061874870
H     1.761816809  5.186288197  5.063333610
H     1.444160507  -0.540085868  5.633036805
H     1.467393020  -0.537337752  6.386327580
H     1.013601307  3.752113132  8.697824110
H     1.740539290  3.940685828  8.746493672
End final coordinates
```

Table S9: Final energy (ground state energy) of free transition metal atom and H<sub>2</sub> (in Rydberg).

| Atom/Molecule  | Final Energy (Ry) |
|----------------|-------------------|
| Ag             | -73.4440623648    |
| Au             | -101.8092043249   |
| Cu             | -121.2143242825   |
| Fe             | -55.2099534839    |
| H <sub>2</sub> | -2.33116958       |
